# Supplementary material
Source: publisher figshare collection journal article supplement (https://karger.figshare.com/ndownloader/files/27895953)
Supplement: Supplementary file 1 [file 27895953]

| **Supplementary Table 2**. Published literature on neoadjuvant systemic chemotherapy for eyelid sebaceous gland carcinoma | | | | | | | | |
| --- | --- | --- | --- | --- | --- | --- | --- | --- |
| Author | Number of patients | Age (years)/Gender | Chemotherapy regimen | Number of cycles of chemotherapy | Response to chemotherapy | Additional therapy | Final outcome at last follow up | Follow-up duration (months) |
|  |  |  |  |  |  |  |  |  |
| Paschal BR et al(19) | 1 | 48/M | Cis+5-FU+Doxo+  Vinblastine | 7 | CR | Adjuvant chemotherapy | Alive | 4 |
| Murthy et al(17) | 1 | 55/F | Carbo+5-FU | 3 | PR | Adjuvant chemotherapy^ and post-op RT | Alive | 26 |
| Priyadarshini et al(18) | 1 | 64/M | Cis+5-FU | 1 | CR | No | Alive | 18 |
| Gogia et al(20) | 1 | 48/M | Cis+5-FU | 3 | PR | Post-op RT | Alive | 10 |
| Kaliki et al(16) | 10 | 58*/6F, 4M | Cis/Carbo+5-FU | 3$ | CR(n=2)/  PR(n=8) | No | Alive(n=9)/  dead(n=1) | 18# |
| Current study | 8 | 52.8/6M, 2F | Cis+5-FU& | 4 | CR(n=2)/  PR(n=5)/  SD(n=1) | EBRT in one patient | Alive(n=5)/  Dead(n=3) | 44.5# |
| ^3 cycles of Carboplatin and 5-Fluorouracil  *mean age of presentation  $mean number of chemotherapy cycles  #mean follow-up period  &One patient received paclitaxel and carboplatin  Cis, cisplatin; 5-FU, 5-fluoro-uracil; Doxo, Doxorubicin; Carbo, carboplatin, paclitaxel; M, male; F, female; RT, radiotherapy; EBRT, external beam radiation therapy; CR, complete response; PR, partial response; SD, stable disease | | | | | | | | |
